# Supplementary material for: A Fully Automated Deep Learning-based Network For Detecting COVID-19 from a New And Large Lung CT Scan Dataset
Source: Preprints.org preprint supplement (doi:10.20944/preprints202006.0031.v2), 2020-07-05
Supplement: Supplementary file 1 [file supplementary]

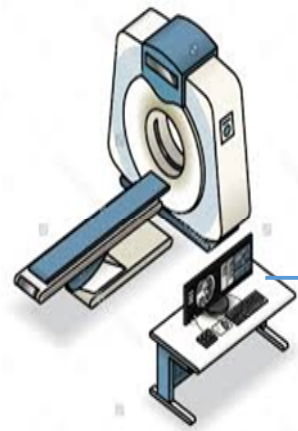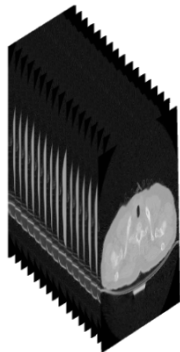

CT scans  
Selecting  
Algorithm

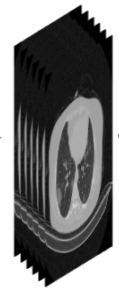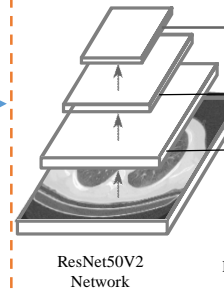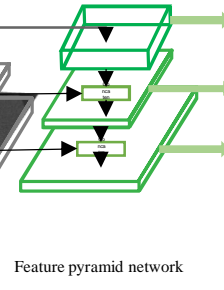

First Features  
Second Features  
Third Features  
Fourth Features  
Fifth Features

Classification of Each Feature Scale

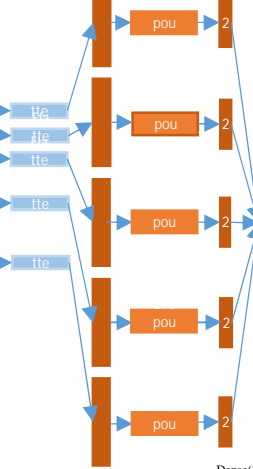

Output = Dense layer  
with 10 neurons  
Concatenate  
Final Classification  
with  
Softmax  
Activation

Results  
Analysis

COVID-19  
Normal
